# Supplementary material for: Opossum APOBEC1 is a DNA mutator with retrovirus and retroelement restriction activity
Source: PubMed Central journal article supplement (PMC5399452; doi:10.1038/srep46719), 2017-04-21
Supplement: srep46719-s1.pdf [file srep46719-s1.pdf]

1 **Supplementary Online Data**

2  
3 Opossum APOBEC1 is a DNA mutator with retrovirus and retroelement  
4 restriction activity

5  
6 Terumasa Ikeda<sup>1,2,3,4,\*</sup>, Mayuko Shimoda<sup>5,6,7</sup>, Diako Ebrahimi<sup>2,3,4</sup>, John L.  
7 VandeBerg<sup>8</sup>, Reuben S. Harris<sup>2,3,4,9</sup>, Atsushi Koito<sup>1</sup>, Kazuhiko Maeda<sup>6,7,\*</sup>

8  
9 <sup>1</sup>Department of Retrovirology and Self-Defense, Faculty of Life Science,  
10 Kumamoto University, Kumamoto 860-8556, Japan

11 <sup>2</sup>Department of Biochemistry, Molecular Biology, and Biophysics,

12 <sup>3</sup>Institute for Molecular Virology, <sup>4</sup>Masonic Cancer Center, University of  
13 Minnesota, Minneapolis, Minnesota 55455, USA

14 <sup>5</sup>Department of Immunology, Graduate School of Medical Science,  
15 Kumamoto University, Kumamoto 860-8556, Japan

16 <sup>6</sup>Laboratory of Host Defense, Research Institute for Microbial Diseases,

17 <sup>7</sup>WPI Immunology Frontier Research Center, Osaka University, Osaka  
18 565-0871, Japan

19 <sup>8</sup>South Texas Diabetes and Obesity Institute, School of Medicine, The  
20 University of Texas Rio Grande Valley, Brownsville/Harlingen/Edinburg,  
21 Texas 78520, USA

22 <sup>9</sup>Howard Hughes Medical Institute, University of Minnesota, Minneapolis,  
23 Minnesota 55455, USA

24  
25 \*Correspondence should be addressed to either of these authors  
26 (e-mails: [tikeda@umn.edu](mailto:tikeda@umn.edu) or [kazmaeda@biken.osaka-u.ac.jp](mailto:kazmaeda@biken.osaka-u.ac.jp)).

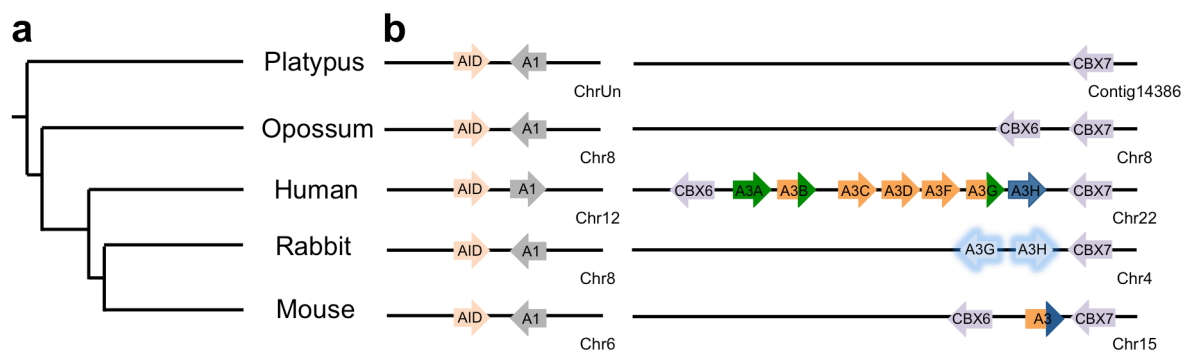

33

34 **Figure S1. No A3 gene exists in monotremes and marsupials.** (a) Phylogenetic  
 35 tree of selected monotreme (platypus), marsupial (opossum), and eutherian mammals  
 36 (human, rabbit and mouse). (b) Genomic organization of *A1*, *AID*, and *A3* genes. A  
 37 homology BLAST search was performed for all seven human *A3* genes (*A3A*, *A3B*,  
 38 *A3C*, *A3D*, *A3F*, *A3G*, and *A3H*) in the genomes of platypus and opossum. Although  
 39 all species have *A1* and *AID*, non-eutherian mammals did not show any evidence for  
 40 homologous *A3* genes between the conserved *CBX6* and *CBX7* genes. We also  
 41 found no evidence to suggest that a gene similar to one of human *A3* genes exists in a  
 42 different locus in the opossum and platypus genomes. Green, orange, and blue colors  
 43 indicate Z1, Z2, and Z3 domains of A3 enzymes. For rabbit, two *A3*-like genes (shown  
 44 in glowing blue color) have been annotated. Based on the available sequences from  
 45 Ensemble, the rabbit *A3G*-like gene (ensemble ID: ENSOCUG00000023532) appears  
 46 to encode a single Z1 domain, and the rabbit *A3H*-like gene (ensemble ID:  
 47 ENSOCUG00000023913) has signatures of Z2 and Z3 domains. However, the  
 48 database sequences may not be complete or correctly annotated.

49

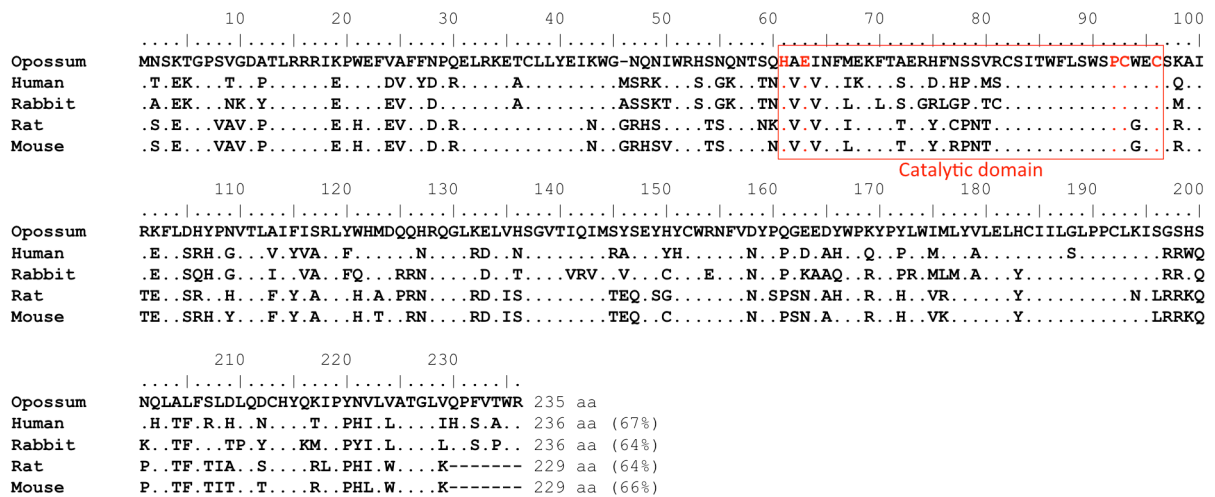

50

51 **Figure S2. Alignment of amino acid sequences of mammalian A1s.** Sequences

52 of the predicted full-length mammalian A1 proteins were aligned with Clustal W

53 software. The numbers above each amino acid sequences are the positions of amino

54 acid residues. The identical amino acids to opossum A1 are indicated by a single dot.

55 The amino acid positions that were not aligned are shown with a bar. The amino acid

56 residues involved in the catalytic reaction are shown in red. The amino acid length of

57 opossum A1 is 235 aa. The percent of amino acid identity of each eutherian A1 with

58 opossum A1 is indicated in parentheses at the end of each sequence.

59

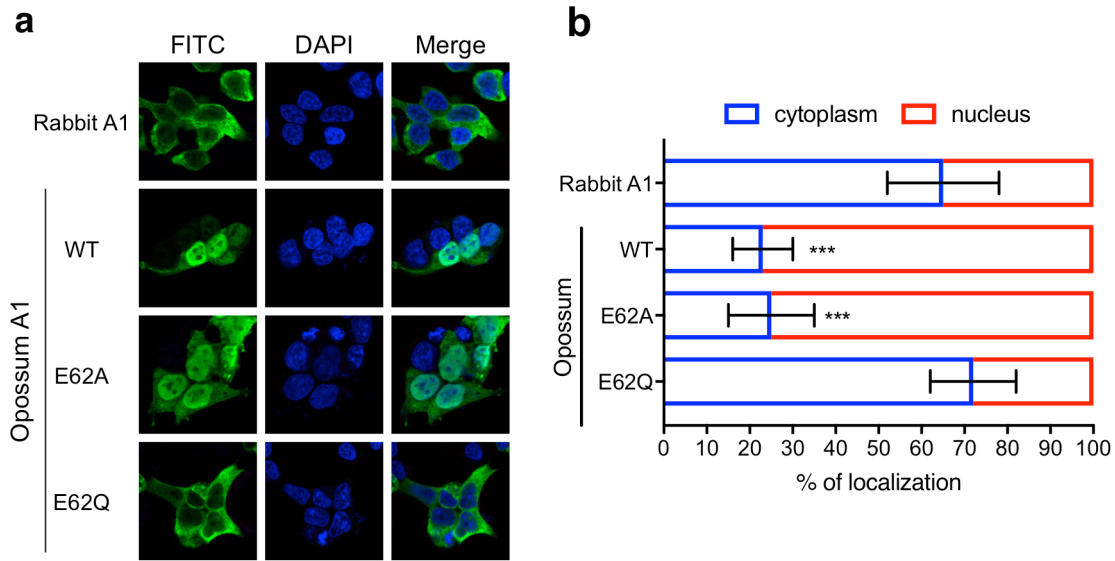

60

61 **Figure S3. Subcellular localisation of opossum A1 in 293T cells.** (a) Images  
 62 show HA-tagged A1s stained with FITC (green) and nuclei stained with DAPI (blue).  
 63 (b) Nuclear and cytoplasmic distribution levels of A1s. The percentage nuclear and  
 64 cytoplasmic localisation is indicated as the graphs (n = 20, average +/- SD). *P* values  
 65 represent comparisons with rabbit A1.
